# Supplementary material for: Multiscale simulations of the hydration shells surrounding spherical Fe3O4nanoparticles and effect on magnetic properties
Source: Royal Society of Chemistry journal article supplement (doi:10.1039/d1nr01014j), 2021-01-01
Supplement: d1nr01014j1.pdf [file d1nr01014j1.pdf]

## **Multiscale simulations of the hydration shells surrounding spherical**

### **Fe<sub>3</sub>O<sub>4</sub> nanoparticles and effect on magnetic properties**

Hongsheng Liu<sup>1,2</sup>, Paulo Siani<sup>2</sup>, Enrico Bianchetti<sup>2</sup>, Jijun Zhao<sup>1</sup>, Cristiana Di  
Valentin<sup>2\*</sup>

<sup>1</sup> Laboratory of Materials Modification by Laser, Ion and Electron Beams, Dalian

University of Technology, Ministry of Education, Dalian 116024, China

<sup>2</sup> Dipartimento di Scienza dei Materiali, Università di Milano-Bicocca,

via R. Cozzi 55, I-20125 Milano, Italy

*e-mail: cristiana.divalentin@unimib.it*

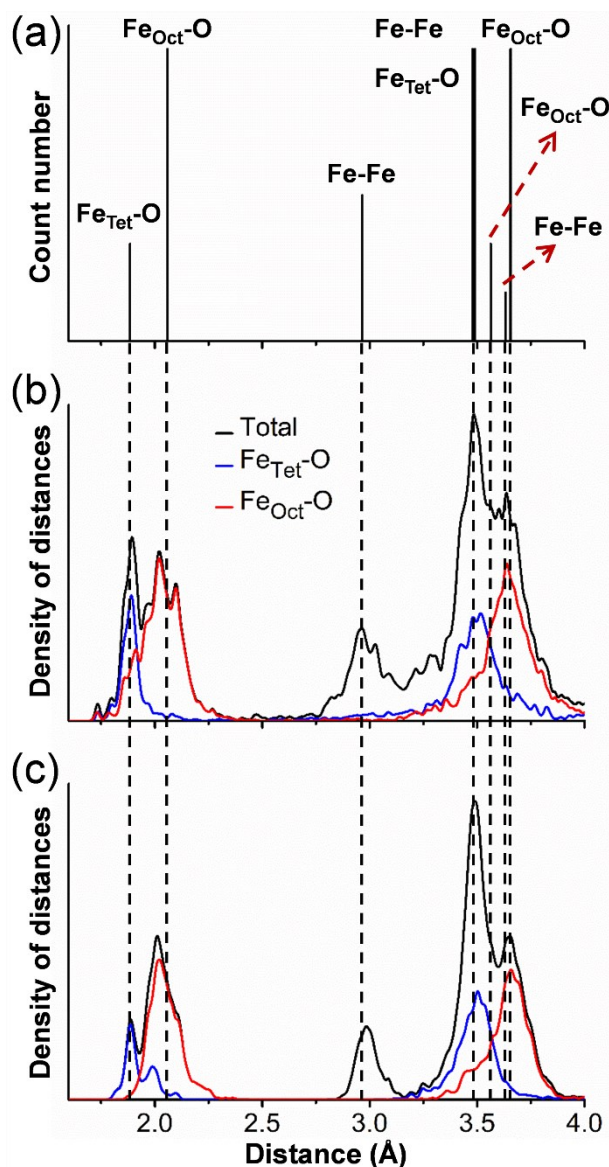

**Figure S1.** Simulated extended X-ray adsorption fine structure (EXAFS) spectra for (a) the  $\text{Fe}_3\text{O}_4$  bulk, (b) nanoparticle (NP) in vacuum and (c) NP with a water monolayer adsorbed. (Data are obtained by HSE06 calculations.)

The real space EXAFS was simulated by calculating the density of distances for each Fe ions with other (Fe or O) ions and projecting them on octahedral and tetrahedral Fe ions with O. In general, the range of  $\text{Fe}_{\text{Tet}}\text{-O}$  and  $\text{Fe}_{\text{Oct}}\text{-O}$  bond lengths is broadened in the case of nanoparticles with respect to bulk magnetite because of the structural distortions and low coordination near the surface. The broader the peaks, the worse the crystallinity of the nanoparticles. Peaks in simulated EXAFS spectra become sharper when the NP is covered by a water monolayer, as compared with the one in vacuum. For example, the peak for  $\text{Fe}_{\text{Oct}}\text{-O}$  centered around 2.0 Å, ranging from 1.70 to 2.30 Å in vacuum, shrinks from 1.89 to 2.27 Å when covered with a water monolayer. Similarly, peaks centered around 3.50 Å and 3.65 Å also become sharper upon the coverage of a water monolayer. Therefore, we can conclude that water adsorption improves the degree of crystallinity of the NP.

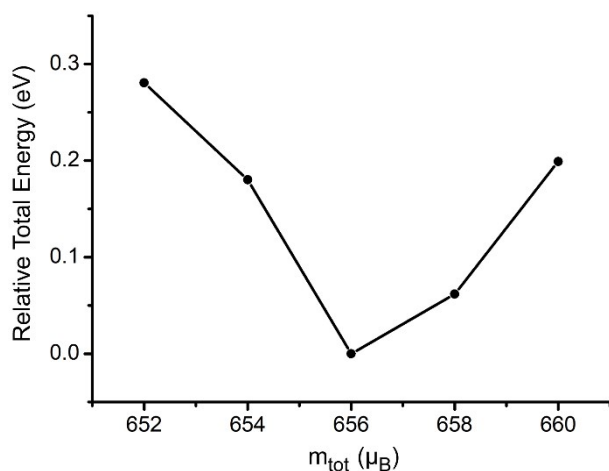

**Figure S2.** The relative total energy as a function of the total magnetic moment ( $m_{\text{tot}}$ ) for the hydrated  $\text{Fe}_3\text{O}_4$  nanosphere. With each  $m_{\text{tot}}$  the nanosphere is fully relaxed with HSE06 method.

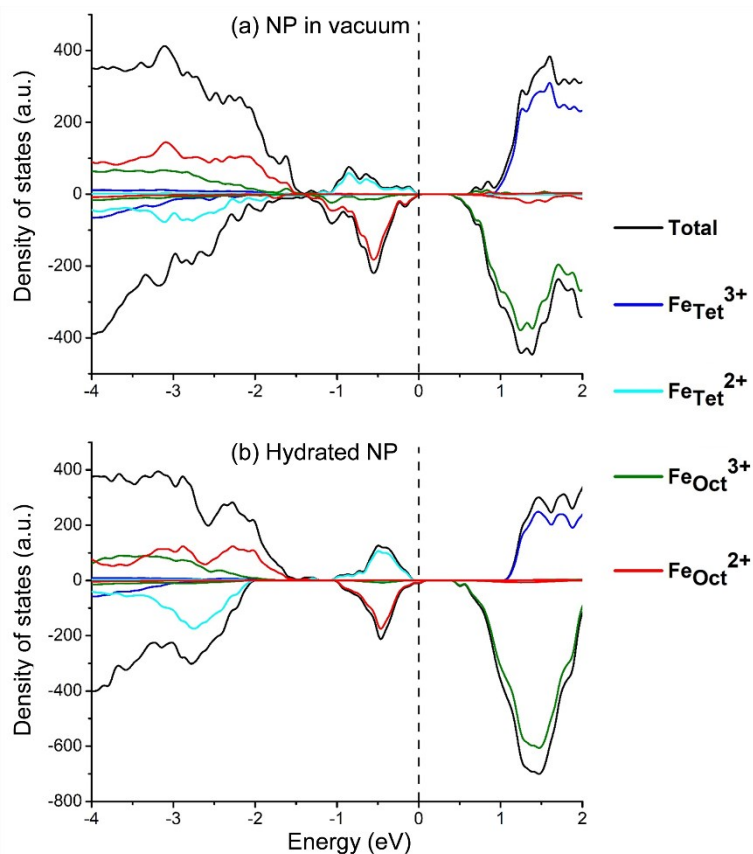

**Figure S3.** Partial density of states (PDOS) on the d orbitals of different Fe ions in the  $\text{Fe}_3\text{O}_4$  NP. (a) NP in vacuum. (b) Hydrated NP. Legend of colors is on the right. The Fermi level is scaled to zero as indicated by the dashed black lines.
